# Supplementary material for: Layer speciation and electronic structure investigation of freestanding hexagonal boron nitride nanosheets
Source: Royal Society of Chemistry journal article supplement (doi:10.1039/c4nr04445b), 2014-12-04
Supplement: c4nr04445b1.pdf [file c4nr04445b1.pdf]

## Supplementary Information for

### Layer Speciation and Electronic Structure Investigation of Freestanding Hexagonal Boron Nitride Nanosheets

Jian Wang<sup>a§</sup>, Zhiqiang Wang<sup>b§</sup>, Hyunjin Cho<sup>c</sup>, Myung Jong Kim<sup>c</sup>, T.K. Sham<sup>b,d</sup>, Xuhui Sun<sup>d,e\*</sup>

<sup>a</sup> Canadian Light Source Inc., University of Saskatchewan, Saskatoon, SK S7N 2V3, Canada

<sup>b</sup> Department of Chemistry, University of Western Ontario, London, ON N6A 5B7, Canada

<sup>c</sup> Soft Innovative Materials Research Center, Korea Institute of Science and Technology, Wanju-gun, Jeollabuk-do 565-905, South Korea

<sup>d</sup> Soochow University-Western University Centre for Synchrotron Radiation Research

<sup>e</sup> Institute of Functional Nano & Soft Materials (FUNSOM) and Collaborative Innovation Center of Suzhou Nano Science & Technology, Soochow University, Suzhou, Jiangsu, 215123, China

<sup>§</sup>Equal contribution to this work

\*Corresponding author: [xhsun@suda.edu.cn](mailto:xhsun@suda.edu.cn)

#### Contents (supplementary figures)

Fig. S1: Normalized STXM spatially-resolved XANES spectra of hBN nanosheets at the B and N K-edges.

Fig. S2: STXM spatially-resolved absolute optical density XANES spectra of hBN nanosheets at the C and O K-edges.

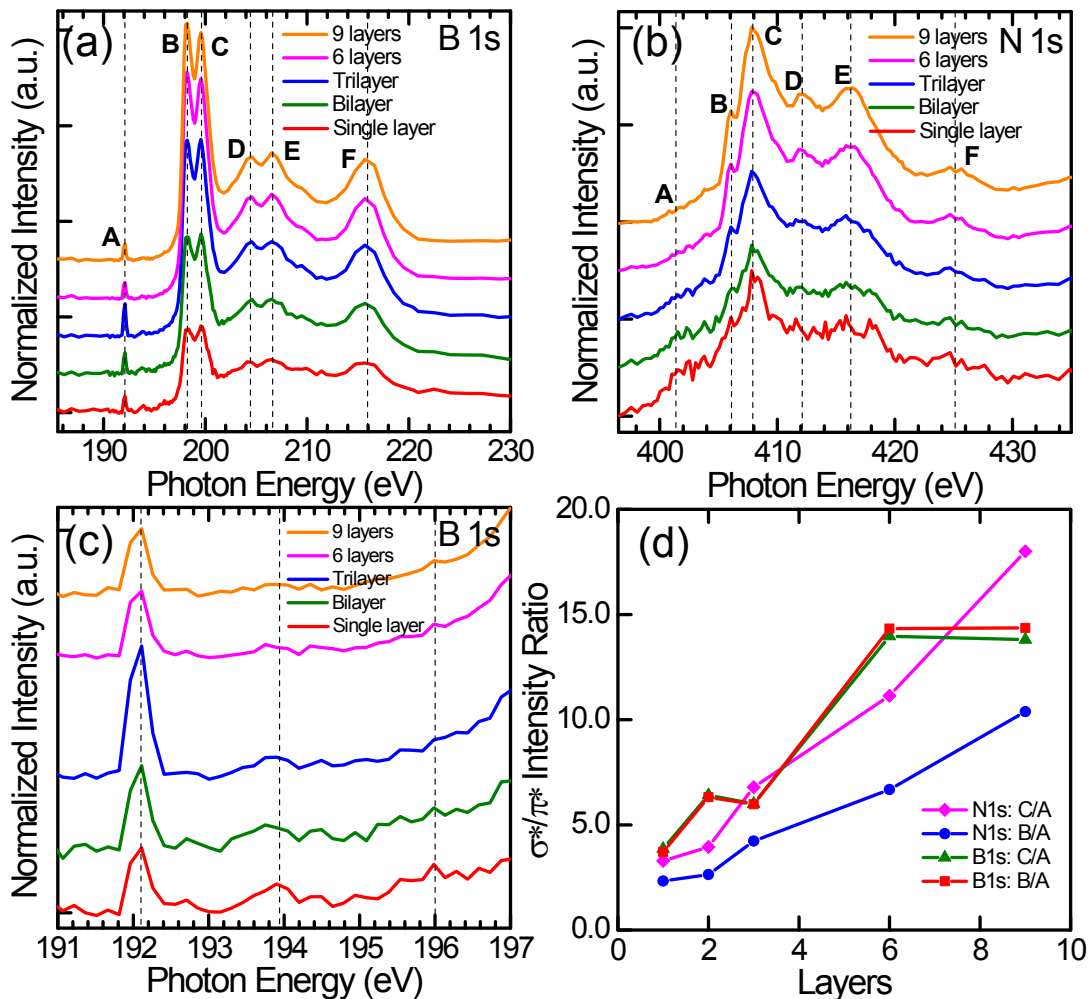

**Fig. S1** Normalized STXM spatially-resolved XANES spectra of hBN nanosheets, (a) and (b) normalized XANES spectra at the B and N K-edge respectively from the selected regions of interest in Fig. 3 (a) in the main text with the normal incidence of the X-ray beam, (c) amplified spectral region from 191 to 197 eV of (a), all vertical dashed lines and letters in the spectra indicate the spectral regions of interest; (d) intensity ratio of  $\sigma^*/\pi^*$  for the first and the second  $\sigma^*$  features as a function of hBN nanosheet layers.

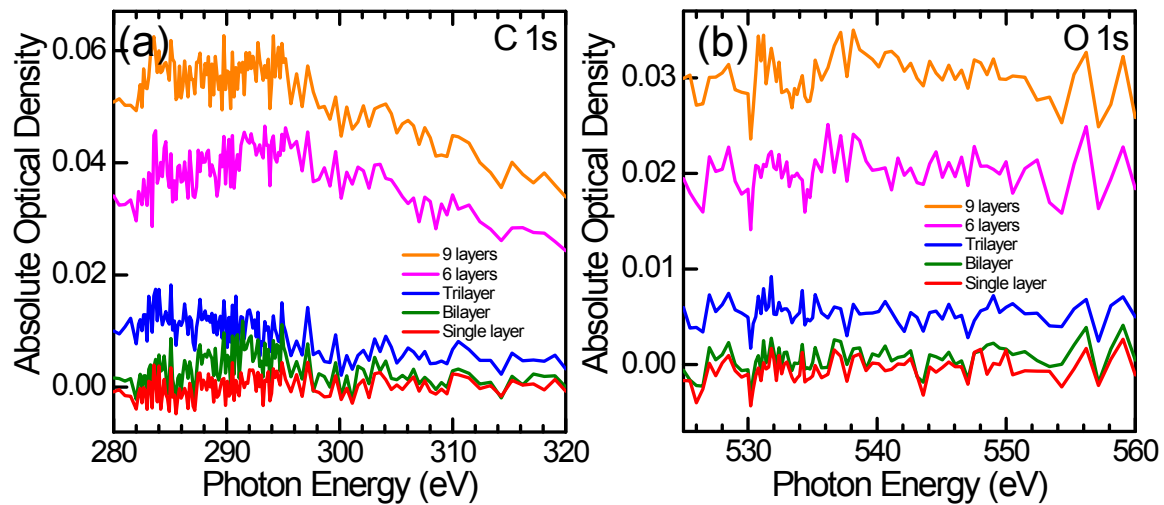

**Fig. S2** STXM spatially-resolved absolute optical density XANES spectra of hBN nanosheets at (a) the C K-edge and (b) the O K-edge from the selected regions of interest in Fig. 3 (a) in the main text with the normal incidence of the X-ray beam.
